# Supplementary material
Source: PubMed Central journal article supplement (PMC6215494)
Supplement: NIHMS1505472-supplement-2.pdf [file NIHMS1505472-supplement-2.pdf]

Supplementary Figure 2

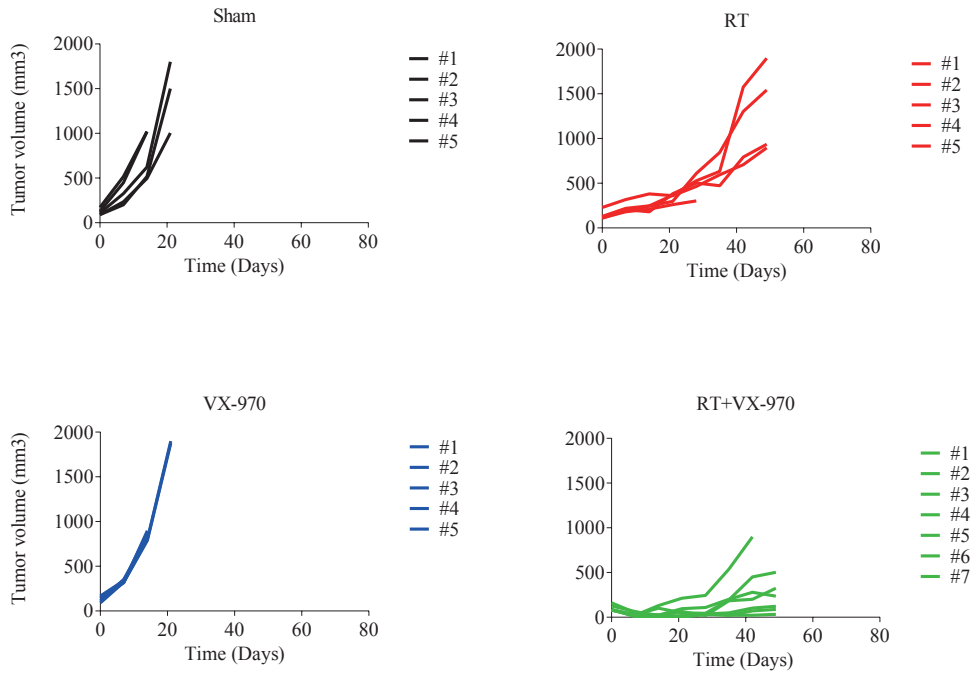

Individual tumor volume data of MCTNBC1 for the experiment shown in figure 5

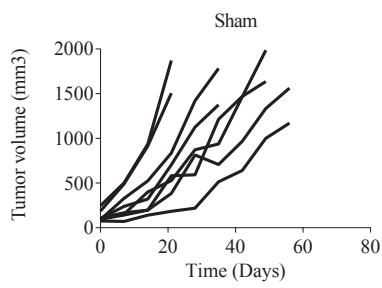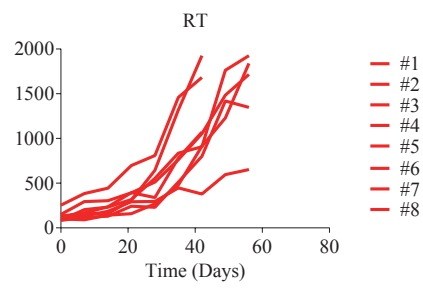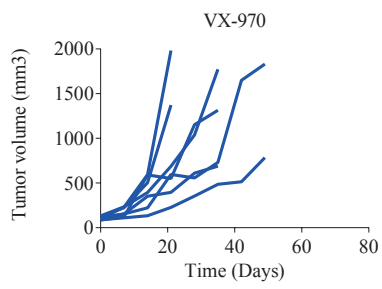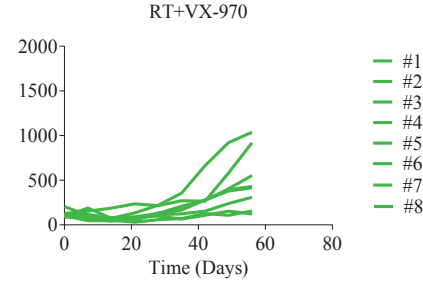

Individual tumor volume data of MCTNBC2 for the experiment shown in figure 5

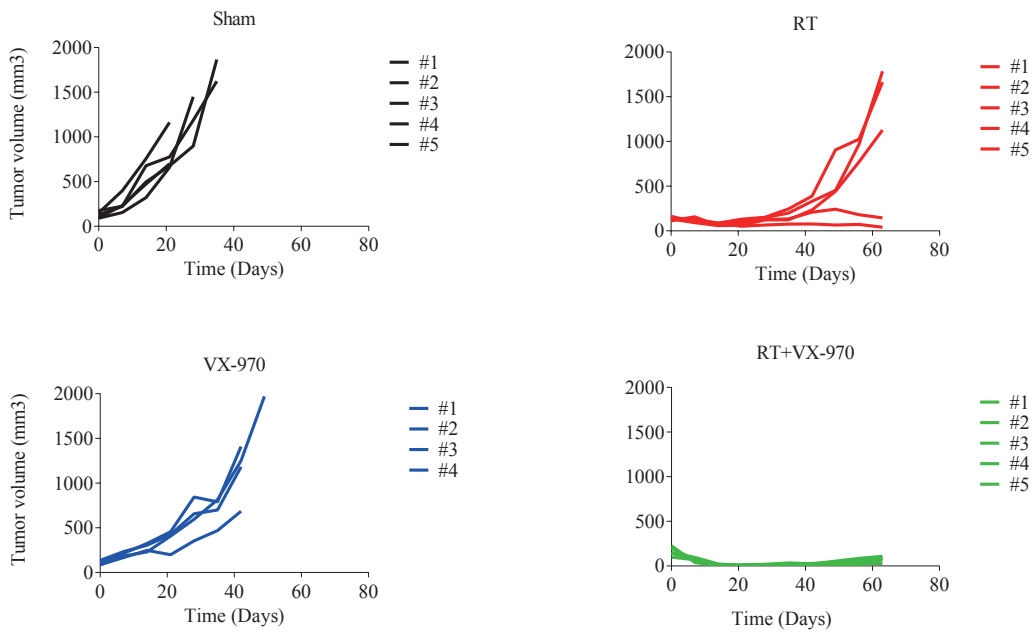

Individual tumor volume data of MCTNBC3 for the experiment shown in figure 5

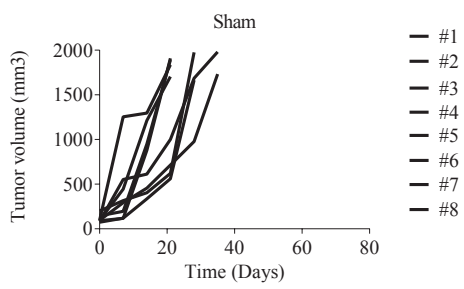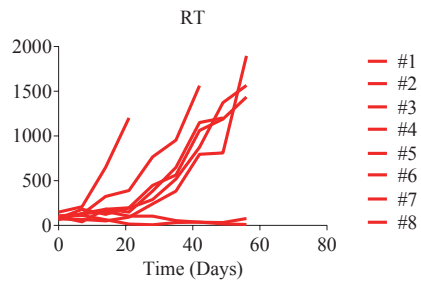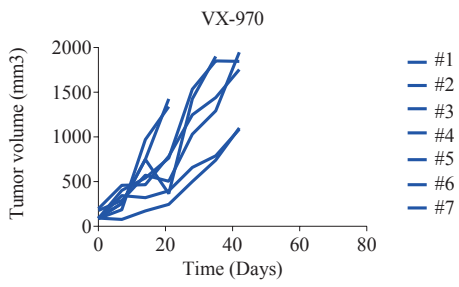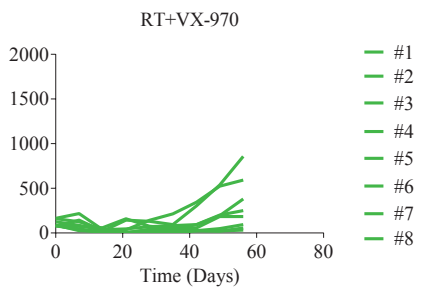

Individual tumor volume data of MCTNBC4 for the experiment shown in figure 5
